# Supplementary material for: Mucosal Melanoma Clinical Management and Prognostic Implications: A Retrospective Cohort Study
Source: MDPI journal article supplement (doi:10.3390/cancers16010227), 2024-01-03

## Article

# Mucosal Melanoma Clinical Management and Prognostic Implications: A Retrospective Cohort Study

Laia Clavero-Rovira<sup>1</sup>, Álvaro Gómez-Tomás<sup>2</sup>, Patricia Bassas<sup>3</sup>, Domingo Bodet<sup>4</sup>, Berta Ferrer<sup>5</sup>, Javier Hernández-Losa<sup>6</sup>, Eva Muñoz-Couselo<sup>7</sup>, Maria Asunción Pérez-Benavente<sup>8</sup>, Vicente García-Patos<sup>9</sup>, Carla Ferrándiz-Pulido<sup>10,\*</sup>

## Supplementary Materials:

**Table S1:** Clinical and tumor characteristic by disease stage.

|                                | Localized (N=11)  | Nodal (N=13)      | Distant (N=11)    | Total (N=35)      | P-value |
|--------------------------------|-------------------|-------------------|-------------------|-------------------|---------|
| <b>Sex</b>                     |                   |                   |                   |                   | 0.486   |
| Female                         | 6 (54.5%)         | 10 (76.9%)        | 6 (54.5%)         | 22 (62.9%)        |         |
| Male                           | 5 (45.5%)         | 3 (23.1%)         | 5 (45.5%)         | 13 (37.1%)        |         |
| <b>Age at diagnosis, years</b> |                   |                   |                   |                   | 0.001   |
| Median (Q1,Q3)                 | 83.0 (78.5, 85.5) | 67.0 (57.0, 82.0) | 63.0 (55.5, 67.5) | 70.0 (60.5, 82.0) |         |
| <b>Smoking, ever</b>           |                   |                   |                   |                   | 0.021   |
| No                             | 6 (66.7%)         | 8 (61.5%)         | 1 (10.0%)         | 15 (46.9%)        |         |
| Yes                            | 3 (33.3%)         | 5 (38.5%)         | 9 (90.0%)         | 17 (53.1%)        |         |
| Unknown                        | 2                 | 0                 | 1                 | 3                 |         |
| <b>Immunosuppression</b>       |                   |                   |                   |                   | 1.000   |
| No                             | 11 (100.0%)       | 12 (92.3%)        | 10 (90.9%)        | 33 (94.3%)        |         |
| Yes                            | 0 (0.0%)          | 1 (7.7%)          | 1 (9.1%)          | 2 (5.7%)          |         |
| <b>Anatomical site</b>         |                   |                   |                   |                   | 0.836   |
| Anorectal                      | 2 (18.2%)         | 2 (15.4%)         | 4 (36.4%)         | 8 (22.9%)         |         |
| Head & Neck                    | 3 (27.3%)         | 4 (30.8%)         | 3 (27.3%)         | 10 (28.6%)        |         |
| Vulvovaginal                   | 6 (54.5%)         | 7 (53.8%)         | 4 (36.4%)         | 17 (48.6%)        |         |
| <b>Breslow depth, mm</b>       |                   |                   |                   |                   | 0.228   |
| Median (Q1,Q3)                 | 3.0 (1.5, 8.6)    | 6.8 (4.5, 9.3)    | 10.5 (8.2, 12.8)  | 5.5 (2.9, 9.0)    |         |

|                                          |             |             |             |            |
|------------------------------------------|-------------|-------------|-------------|------------|
| Unknown                                  | 2           | 5           | 9           | 16         |
| <b>Breslow depth, mm</b>                 | 0.241       |             |             |            |
| Unknown                                  | 2           | 5           | 9           | 16         |
| <5mm                                     | 5 (55.6%)   | 2 (25.0%)   | 0 (0.0%)    | 7 (36.8%)  |
| ≥5mm                                     | 4 (44.4%)   | 6 (75.0%)   | 2 (100.0%)  | 12 (63.2%) |
| <b>BRAF mutations</b>                    | 0.781       |             |             |            |
| No                                       | 9 (100.0%)  | 11 (84.6%)  | 10 (90.9%)  | 30 (90.9%) |
| Yes                                      | 0 (0.0%)    | 2 (15.4%)   | 1 (9.1%)    | 3 (9.1%)   |
| Unknown                                  | 2           | 0           | 0           | 2          |
| <b>Nodal involvement</b>                 | < 0.001     |             |             |            |
| No                                       | 11 (100.0%) | 3 (23.1%)   | 1 (9.1%)    | 15 (42.9%) |
| Yes                                      | 0 (0.0%)    | 10 (76.9%)  | 10 (90.9%)  | 20 (57.1%) |
| <b>Nodal status assessment technique</b> |             |             |             |            |
| CT                                       | 0           | 1 (10.0%)   | 3 (30.0%)   | 4 (20.0%)  |
| MRI                                      | 0           | 2 (20.0%)   | 2 (20.0%)   | 4 (20.0%)  |
| PET-CT                                   | 0           | 4 (40.0%)   | 5 (50.0%)   | 9 (45.0%)  |
| SLNB                                     | 0           | 3 (30.0%)   | 0 (0.0%)    | 3 (15.0%)  |
| Unknown                                  | 11          | 3           | 1           | 15         |
| <b>Metastasis</b>                        | < 0.001     |             |             |            |
| No                                       | 11 (100.0%) | 13 (100.0%) | 0 (0.0%)    | 24 (68.6%) |
| Yes                                      | 0 (0.0%)    | 0 (0.0%)    | 11 (100.0%) | 11 (31.4%) |
| <b>Surgical resection</b>                | 0.006       |             |             |            |
| No                                       | 0 (0.0%)    | 3 (23.1%)   | 7 (63.6%)   | 10 (28.6%) |
| Yes                                      | 11 (100.0%) | 10 (76.9%)  | 4 (36.4%)   | 25 (71.4%) |
| <b>Radiotherapy</b>                      | 0.771       |             |             |            |
| No                                       | 9 (81.8%)   | 9 (69.2%)   | 9 (81.8%)   | 27 (77.1%) |
| Yes                                      | 2 (18.2%)   | 4 (30.8%)   | 2 (18.2%)   | 8 (22.9%)  |

|                                    |                   |                  |                  |                  |         |
|------------------------------------|-------------------|------------------|------------------|------------------|---------|
| Systemic therapy                   |                   |                  |                  |                  | < 0.001 |
| No                                 | 10 (90.9%)        | 2 (15.4%)        | 0 (0.0%)         | 12 (34.3%)       |         |
| Yes                                | 1 (9.1%)          | 11 (84.6%)       | 11 (100.0%)      | 23 (65.7%)       |         |
| Number of systemic treatment lines |                   |                  |                  |                  | < 0.001 |
| Median (Q1,Q3)                     | 0.0 (0.0, 0.0)    | 2.0 (1.0, 3.0)   | 1.0 (1.0, 2.0)   | 1.0 (0.0, 2.0)   |         |
| Follow-up/survival time, months    |                   |                  |                  |                  | 0.063   |
| Median (Q1,Q3)                     | 35.0 (15.0, 58.0) | 24.0 (9.0, 35.0) | 10.0 (6.5, 18.0) | 21.0 (8.0, 35.0) |         |
| Death                              |                   |                  |                  |                  | 0.033   |
| No                                 | 7 (63.6%)         | 2 (15.4%)        | 2 (18.2%)        | 11 (31.4%)       |         |
| Yes                                | 4 (36.4%)         | 11 (84.6%)       | 9 (81.8%)        | 24 (68.6%)       |         |

**Figure S1:** Kaplan–Meier Curves for overall survival by anatomical site vagina vs vulva.

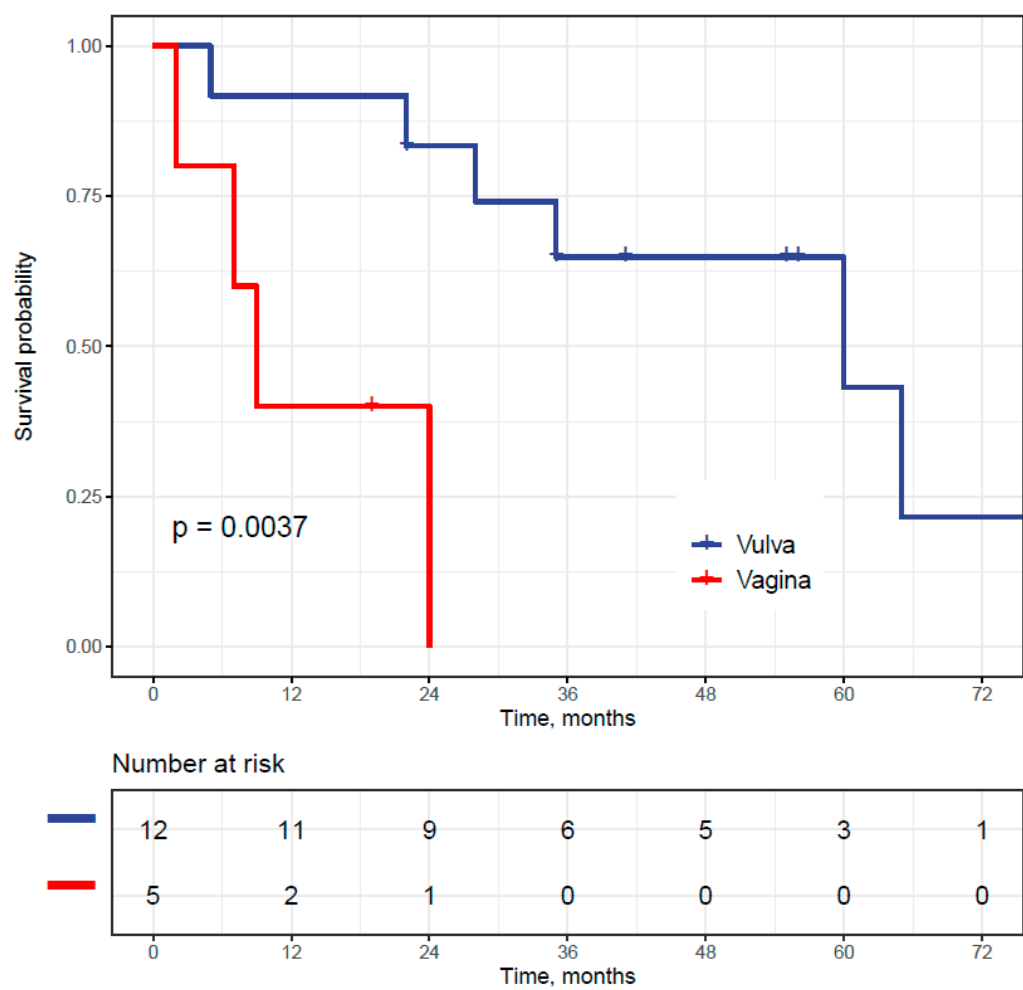

Supplement: s1 [file s1]
